# Supplementary material for: Duplication and functional divergence of a calcium sensor in the Brassicaceae
Source: PubMed Central journal article supplement (PMC7210777; doi:10.1093/jxb/eraa031), 2020-01-28
Supplement: eraa031_suppl_supplementary_figures_s1-s3_and_tables_s1-s2.pdf [file eraa031_suppl_supplementary_figures_s1-s3_and_tables_s1-s2.pdf]

## Supplementary Data

Duplication and functional divergence of a calcium sensor in the Brassicaceae

Monihan SM, Magness CA, Ryu C-H, McMahon MM, Beilstein MA, Schumaker KS

The following Supporting Information is available for this article:

Supplementary Fig. S1 Specificity of *CBL10* gene expression in transgenic Arabidopsis

Supplementary Fig. S2 Transposable elements may have mediated the *CBL10* duplication

Supplementary Fig. S3 Differences in CBL10 function reside in the amino-terminus

Supplementary Table S1 Ratio of species growth in the absence and presence of salt

Supplementary Table S2 Primers

Supplementary Fig. S1

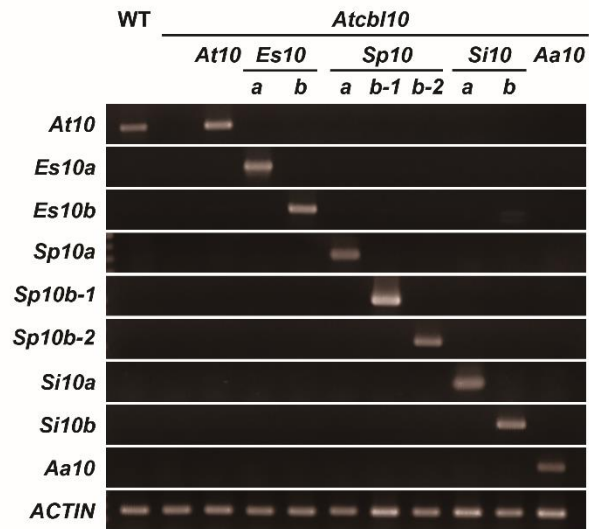

Specificity of *CBL10* gene expression in transgenic Arabidopsis. Each *CBL10* gene was expressed in the *Atcbl10* mutant under the control of the Cauliflower Mosaic Virus 35S promoter. RNA was isolated from two-week-old seedlings. Gene/species-specific primers amplify a single *CBL10* gene from each species. One representative line for each *CBL10* gene is shown. *AtCBL10* (*At10*), *EsCBL10a* (*Es10a*), *EsCBL10b* (*Es10b*), *SpCBL10a* (*Sp10a*), *SpCBL10b-1* (*Sp10b-1*), *SpCBL10b-2* (*Sp10b-2*), *SiCBL10a* (*Si10a*), *SiCBL10b* (*Si10b*), and *AaCBL10* (*Aa10*). *ACTIN*, loading control.

Supplementary Fig. S2

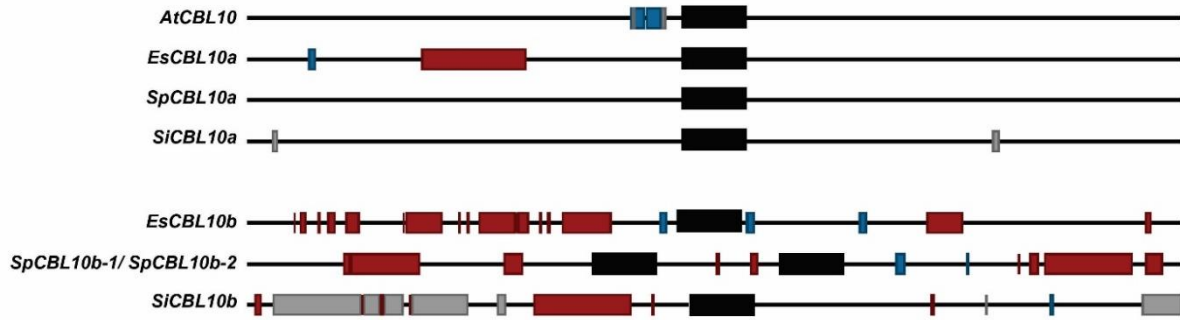

Transposable elements may have mediated the *CBL10* duplication. Black boxes, *CBL10* genes; blue boxes, DNA transposons; red boxes, retroelements; gray boxes, unknown sequence.

Supplementary Fig. S3

(a)

|            | Insertion       |
|------------|-----------------|
| EsCBL10b   | MDW-----PRFSS   |
| SpCBL10b-2 | MDW-----PQVSS   |
| SpCBL10b-1 | MDW-----PQVSS   |
| SpCBL10a   | MDW-----PKVSS   |
| SiCBL10b   | MDL-----PKEAS   |
| AtCBL10    | ME-----QVSS     |
| SiCBL10a   | MDW-----PKVSS   |
| EsCBL10a   | MVPVNQCLLDPKVSS |
| AaCBL10    | MDW-----PLVSP   |

(b)

|                                       | Hydrophobic domain                      |
|---------------------------------------|-----------------------------------------|
| Complement<br><i>Atsos3</i>           | EsCBL10a RSSLTVGEQICAVFIPFFAVVDFLFSTM   |
|                                       | SpCBL10b-1 RSSLTVGEQICAVFIPFFAIDDFLFSTV |
|                                       | SpCBL10b-2 RSSLTVGEQICAVFIPFFAMIDFLLSTV |
|                                       | SiCBL10b ISSSLTVGEKICAVFIPLFAIDDFLFSTV  |
| AtSOS3                                | M                                       |
| Do not<br>complement<br><i>Atsos3</i> | EsCBL10b RSSLTVGEKICAVFIPLIAIIDILFSTV   |
|                                       | AtCBL10 RSSLTVGEQICAVFIPFFAIDVLSV       |
|                                       | SpCBL10a RSSLTVGEKICAVFIPFFVIIDFLVSTV   |
|                                       | SiCBL10a RSSLTVGEQICAVFIPFFAIDDFLFSTV   |
|                                       | AaCBL10 RSSFVTVGEHLCAVFIPLFAIDDFLISNV   |

Differences in CBL10 function reside in the amino-terminus. Amino acids from CBL10 and AtSOS3 proteins were aligned and color coded based on side chain properties. Blue, non-polar side chains; magenta, polar side chains; green, negatively charged side chains; orange, positively charged side chains. Insertion, insertion of seven amino acids in the amino-terminus of EsCBL10a; hydrophobic domain, hydrophobic residues. Chimeric EsCBL10a and EsCBL10b proteins were generated and the region of the protein important for activation of the SOS pathway (a) and complementation of *Atsos3* (b) was identified (Monihan et al., 2019). (a) Brassicaceae CBL10 proteins are organized based on ability to activate the SOS pathway in yeast (Fig. 6). (b) Brassicaceae CBL10 and AtSOS3 proteins are organized based on ability to complement the *Atsos3* salt-sensitive phenotype (Fig. 7). Black box, amino acids that might underlie complementation.

Supplementary Table S1

| Primers                                                                         |                                |                                       |
|---------------------------------------------------------------------------------|--------------------------------|---------------------------------------|
| Transcript                                                                      | Forward primer                 | Reverse primer                        |
| <b>Analysis of endogenous transcript levels in Brassicaceae</b>                 |                                |                                       |
| <i>AtCBL 10</i>                                                                 | GCGCCATGGAACAAGTTTCCTCTAGAT    | GGCGGTACCGTCTTCAACCTCAGTGTGAAT        |
| <i>EsCBL 10a</i>                                                                | GCGCTCGAGATGGTCCC GGTTAATCAATG | GGCGGATCCCGGTCTTCAACCTCTGTGTTGA       |
| <i>EsCBL 10b</i>                                                                | GCGCTCGAGATGGACTGGCCAGATTTTCC  | GGCGGATCCCGGTCTTCAACCTCAGTATTGA       |
| <i>SpCBL 10a</i>                                                                | CGTCAAGGTCTTCTAAGAGC           | AGTAGCCAAGCTGGTCAAAT                  |
| <i>SpCBL 10b-1</i>                                                              | GAAGATAAAGGGATTGCC TTTG        | CTTACAATTAATACGTATACCTTGG A           |
| <i>SpCBL 10b-2</i>                                                              | CAAAGTGACTTACTCCGTTTGT         | GTGAAAAGATTACCGGATGTT C               |
| <i>SiCBL 10a</i>                                                                | CACCAATCTCTGAGGACAACGAAG       | GAGAGATAACCGGTGCTGT                   |
| <i>SiCBL 10b</i>                                                                | CGTTGTGAACTGATTGATACAG         | CAGAAACGGTTGTTCC CAG                  |
| <i>AaCBL 10</i>                                                                 | GCGAACGCAACGCCTAAAAC           | TTTGTCTCAATTGGTGCAGAAG                |
| <i>ACT2</i> (all species)                                                       | GAACCACCGATCCAGACACT           | GGAATCCACGAGACGACCTA                  |
| <b>Enriching for specific <i>SpCBL 10</i> transcript (UTR and CDS)</b>          |                                |                                       |
| <i>SpCBL 10a</i>                                                                | CGTCAAGGTCTTCTAAGAGC           | AGTAGCCAAGCTGGTCAAAT                  |
| <i>SpCBL 10b-1</i>                                                              | GAAGATAAAGGGATTGCC TTTG        | CTTACAATTAATACGTATACCTTGG A           |
| <i>SpCBL 10b-2</i>                                                              | CAAAGTGACTTACTCCGTTTGT         | GTGAAAAGATTACCGGATGTT C               |
| <b>Cloning for expression in <i>Atcb10</i> and <i>Atsos3</i></b>                |                                |                                       |
| <i>SpCBL 10a</i>                                                                | GCGCTCGAGATGGACTGGCCGAAAGTTTCC | GGCGGATCCCGGTCTTCAACCTCAGTGTG         |
| <i>SpCBL 10b-1</i>                                                              | GCGCTCGAGATGGACTGGCTCAAGTTTCC  | GGCGGATCCCGGTCTTCCACCC CAGTGTG        |
| <i>SpCBL 10b-2</i>                                                              | GCGCTCGAGATGGACTGGCCCAAGTTTCC  | GGCGGATCCCGGTCTTCAACCC CAGTGTG        |
| <i>SiCBL 10a</i>                                                                | GCGCTCGAGATGGACTGGCCGAAAGTTTCC | GGCGGATCCCGGTCTTCAACCTCAGTGTG         |
| <i>SiCBL 10b</i>                                                                | GCGCTCGAGATGGACTTGCCGAAAGAAGCC | GGCGGATCCCGGTCTTCAACCC CAGTGTG        |
| <i>AaCBL 10</i>                                                                 | GCGCTCGAGATGGATTGGCCACTAGTTTCC | GGCGGATCCCGATCTTCAACTTCAGTATTGA       |
| <b>Analysis of transcript levels in <i>Atcb10</i>, <i>Atsos3</i>, and Yeast</b> |                                |                                       |
| <i>AtCBL 10</i>                                                                 | TGCCGAGCACATCGCCTCGG           | AATCTGCATCAGCAAATGTTTTATC             |
| <i>EsCBL 10a</i>                                                                | GGTTAATCAATGTCTCCTGGAC         | TTCTTCAATAAGGCGGGATG                  |
| <i>EsCBL 10b</i>                                                                | CCTCTAGATCCAGTTCTTTG           | TGGGAATGCTGTTGTCACATCC                |
| <i>SpCBL 10a</i>                                                                | ATATGTCAGAAAGTGGATCTGT         | TCATAGAGCCTAAATGCAAA                  |
| <i>SpCBL 10b-1</i>                                                              | CGAATCTGGCTCGTCTTGCCCTTG       | CTAGGATGTTTATGCACATACG                |
| <i>SpCBL 10b-2</i>                                                              | CCGACATGCCGACACACGGAC          | CAATAAGCCGGGATGCTTAAG                 |
| <i>SiCBL 10a</i>                                                                | TTGATTACACAAGGAAGAGCTT         | CGATCTTCTCCTCGATAGGC                  |
| <i>SiCBL 10b</i>                                                                | CTTGCCGAAAGAAGCCTCTAT          | AATCTGCATCAGCAAATGTTTTATC             |
| <i>AaCBL 10</i>                                                                 | GCGAACGCAACGCCTAAAAC           | TTTGTCTCAATTGGTGCAGAAG                |
| <i>AtCBL 10</i>                                                                 |                                |                                       |
| <i>EsCBL 10a</i>                                                                | GGCTTGATTACACAAGGAAGA          | TCATAGAGCCTAAATGCAAA                  |
| <i>EsCBL 10b</i>                                                                |                                |                                       |
| <i>AtCBL 10</i>                                                                 |                                |                                       |
| <i>SpCBL 10a</i>                                                                | TTTGTTGATGAAAAGAAGA            | TCATAGAGCCTAAATGCAAA                  |
| <i>SpCBL 10b-1</i>                                                              |                                |                                       |
| <i>SpCBL 10b-2</i>                                                              |                                |                                       |
| <i>AtCBL 10</i>                                                                 |                                |                                       |
| <i>SiCBL 10a</i>                                                                | TTGATTACACAAGGAAGAGCTT         | AATCTGCATCAGCAAATGTTTTATC             |
| <i>SiCBL 10b</i>                                                                |                                |                                       |
| <i>ACTIN2</i>                                                                   | GTCTGACAAACGGTATTGTG           | GAGCTGGTCTTTGAGGTTTC                  |
| <i>18SrRNA</i>                                                                  | AAACGGCTACCACATCCAAG           | CCTCCAATTGTTCTCTGTTA                  |
| <b>Cloning for expression in yeast</b>                                          |                                |                                       |
| <i>SpCBL 10</i>                                                                 | GCGCTCGAGATGGACTGGCCGAAAGTTTCC | TTTGCGGCCGCTCAGTCTTCAACCTCAGTGTGAAG   |
| <i>SpCBL 10b-1</i>                                                              | GCGCTCGAGATGGACTGGCTCAAGTTTCC  | TTTGCGGCCGCTCAGTCTTCCACCC CAGTGTG     |
| <i>SpCBL 10b-2</i>                                                              | GCGCTCGAGATGGACTGGCCCAAGTTTCC  | TTTGCGGCCGCTCAGTCTTCAACCC CAGTGTGAATA |
| <i>SiCBL 10a</i>                                                                | GCGCTCGAGATGGACTGGCCGAAAGTTTCC | TTTGCGGCCGCTCAGTCTTCAACCTCAGTGTG      |
| <i>SiCBL 10b</i>                                                                | GCGCTCGAGATGGACTTGCCGAAAGAAGCC | TTTGCGGCCGCTCAGTCTTCAACCC CAGTGTG     |
| <i>AaCBL 10</i>                                                                 | GCGCTCGAGATGGATTGGCCACTAGTTTCC | TTTGCGGCCGCTCAATCTTCAACTTCAGTAT       |

Supplementary Table S2 Ratio of species growth in the absence and presence of salt

|                     | 50 mM NaCl |       | 100 mM NaCl |       | 150 mM NaCl |       | 300 mM NaCl |       |
|---------------------|------------|-------|-------------|-------|-------------|-------|-------------|-------|
|                     | Mean       | Group | Mean        | Group | Mean        | Group | Mean        | Group |
| <b>Schrenkiella</b> | 97.591     | A     | 60.564      | A     | 52.363      | A     | 25.518      | A     |
| <b>Sisymbrium</b>   | 106.783    | A     | 59.753      | A     | 35.462      | A     | 20.673      | AB    |
| <b>Eutrema</b>      | 88.266     | A     | 62.674      | A     | 36.806      | A     | 17.087      | B     |
| <b>Arabidopsis</b>  | 54.521     | B     | 20.703      | B     | 11.409      | B     | 4.569       | C     |
| <b>Aethionema</b>   | 45.177     | B     | 8.09        | B     | 5.308       | B     | 3.043       | C     |

Results are from a Friedman's analysis (non-parametric, two-way ANOVA) of salt/control ratios for each of the salt treatments. F was significant in each and 5% Tukey mean separations are presented. Mean values with the same letter are not significantly different.
